# Supplementary material for: A bHLH transcription factor regulates iron intake under Fe deficiency in chrysanthemum
Source: PubMed Central journal article supplement — Sci Rep. 2014 Oct 24;4:6694. doi: 10.1038/srep06694 (PMC4208034; doi:10.1038/srep06694), 2014-10-24
Supplement: srep06694-s1.pdf [file srep06694-s1.pdf]

# **A bHLH transcription factor regulates iron intake under Fe deficiency in chrysanthemum**

Authors: Min Zhao, Aiping Song, Peiling Li, Sumei Chen, Jiafu Jiang\*, Fadi Chen\*

## **Supplementary Information**

Supplementary Table S1 Primer names and sequences used in this study

Supplementary Fig. S1 A phylogenetic analysis shows that CmbHLH1 is closely related to the *A. thaliana* protein ILR3 (NP\_200279.1). *A. thaliana* ILR3 (NP\_200279.1) and bHLH (AAM64276.1), *Camellia sinensis* bHLH1 (AEI83428.1), *Fragaria x ananassa* bHLH (AFN84533.1), *Glycine max* ILR3-like (XP\_003540036.1) and ILR3-like isoform 1 (XP\_003527314.1), *Lotus japonicas* bHLH (AFK48825.1), *Malus domestica* bHLH (ADL36593.1), *Medicago truncatula* ILR3 (XP\_003596613.1), *Nicotiana tabacum* bHLH (ACG60665.1), *Populus trichocarpa* bHLH (XP\_002316706.1), *Ricinus communis* bHLH (XP\_002522828.1), *Tamarix hispida* MYC (AEJ88330.1), *Thellungiella halophila* bHLH (BAJ33812.1), *Vitis vinifera* ILR3 (XP\_002282727.1) and ILR3-like (XP\_002274829.2).

Supplementary Fig. S2 The morphology of sense, antisense transgenic and wild type plants at seedling stage.

Supplementary Fig. S3 The transcription of *CmFRO3* and *CmPP2C* in *CmbHLH1* transgenic plants. (a) *CmFRO3* in plants subjected to Fe deficiency, (b) *CmPP2C* in plants treated with ABA.

Supplementary Fig. S4 *CmPP2C* transcription in response to Fe deficiency. \*\*, difference significant at  $P < 0.01$ .

**Table S1 Primer names and sequences used in this study**

| Primer              | Sequence (5'-3')                            | Usage                      |
|---------------------|---------------------------------------------|----------------------------|
| CmbHLH1-M-F         | TACCCGCCACATTTCCAC                          | Gene Fragment              |
| CmbHLH1-M-R         | GCTCCTCGGCTCAGATTA                          | Gene Fragment              |
| dT-AP               | AAGCAGTGGTATCAACGCAGAGTACTTTTTTTTTTTTTTTTTT | 3'RACE                     |
| AP                  | AGCAGTGGTATCAACGCAGAG                       | 3'RACE                     |
| CmbHLH1-3R-1F       | TTGCAGCAGCTCAAGGCCA                         | 3'RACE                     |
| CmbHLH1-3R-2F       | ATCACGTGCTTCGCCCTCT                         | 3'RACE                     |
| CmbHLH1-5R-1R       | AGCTTATCCCTCCTCAAT                          | 5'RACE                     |
| CmbHLH1-5R-2R       | TCCGCACTTGTCGAATCGTAG                       | 5'RACE                     |
| CmbHLH1-5R-3R       | GTAGGTAGGGCGGTTTG                           | 5'RACE                     |
| AAP                 | GGCCACGCGTCGACTAGTACGGGGGGGGGGGG            | 5'RACE                     |
| AUAP                | GGCCACGCGTCGACTAGTAC                        | 5'RACE                     |
| CmbHLH1-Full-F      | TACCCGCCACATTTCCAC                          | ORF                        |
| CmbHLH1-Full-R      | CATTACGCAATGGCAAACC                         | ORF                        |
| CmbHLH1-TP1-1R      | GTCCGTAGTCTCCGGTGAAACCATAGT                 | TAIL-PCR                   |
| CmbHLH1-TP1-2R      | AAGATTTTCCGGTGAAATGTGGCGGGT                 | TAIL-PCR                   |
| CmbHLH1-TP1-3R      | TGTTGTTCTCGTAAGACGCTGTTTGTA                 | TAIL-PCR                   |
| CmbHLH1-TP2-1R      | ACCCGAAACCGATGGGGAAAACCGAAA                 | TAIL-PCR                   |
| CmbHLH1-TP2-2R      | GCGGCTTTCTACTCTACTCCTTAATAGCACATATCTTG      | TAIL-PCR                   |
| CmbHLH1-TP2-3R      | CCCCGCACTCTTTAATCTTTACACATTACGAATATC        | TAIL-PCR                   |
| GAPDH-F             | GCTGTATCCCCATTCGTT                          | qPCR                       |
| GAPDH-R             | AGAAGGCAAGCTCAAGGG                          | qPCR                       |
| CmbHLH1-RT-F        | GCCAAACAATGGGCAATA                          | qPCR                       |
| CmbHLH1-RT-R        | TACAGGAGGGCGAAGCA                           | qPCR                       |
| CmbHLH1-Sense-F     | GCGGATCCATGGTTTCACCGGAGA                    | Sense vector               |
| CmbHLH1-Sense-R     | TCGAGCTCTTAGGCAACAGGAGG                     | Sense vector               |
| CmbHLH1-Antisense-F | GCGGATCCAATCCGTTGCTCTCC                     | Antisense vector           |
| CmbHLH1-Antisense-R | TCGAGCTCTACCAAAGTGGCCTCT                    | Antisense vector           |
| HPTII-F             | CGTCTGTGCGAGAAGTTTC                         | Hyg PCR                    |
| HPTII-R             | TACTTCTACACAGCCATC                          | Hyg PCR                    |
| CmbHLH-Dra-F        | AGGCTTTAAAATGGTTTCACCGGAG                   | Intracellular localization |
| CmbHLH-Not-R        | TTTGCGGCCGCGAGGCAACAGGAGGGCG                | Intracellular localization |
| Pro-SacII-F         | TCCCCGCGGTGCCTTAGAGTACCCAC                  | Promoter analysis          |
| Pro-NheI-R          | CTAGCTAGCAGTCGGAAATTGAAGA                   | Promoter analysis          |
| CmHA-F              | AGGATTTTCGGTAAGGAACAACG                     | Transcription analysis     |
| CmHA-R              | CAAGACCCTTGAGTCTGACCACT                     | Transcription analysis     |
| CmFRO3-F            | TGTTATCATCCCCAAATCCTGTT                     | Transcription analysis     |
| CmFRO3-R            | ACCATCACTAGCATATCGTGCC                      | Transcription analysis     |
| CmPP2C-F            | TAGTGATGGACTTTGGGATGTGG                     | Transcription analysis     |
| CmPP2C-R            | GCCAATGCCAACTTTGTCTAGTAA                    | Transcription analysis     |

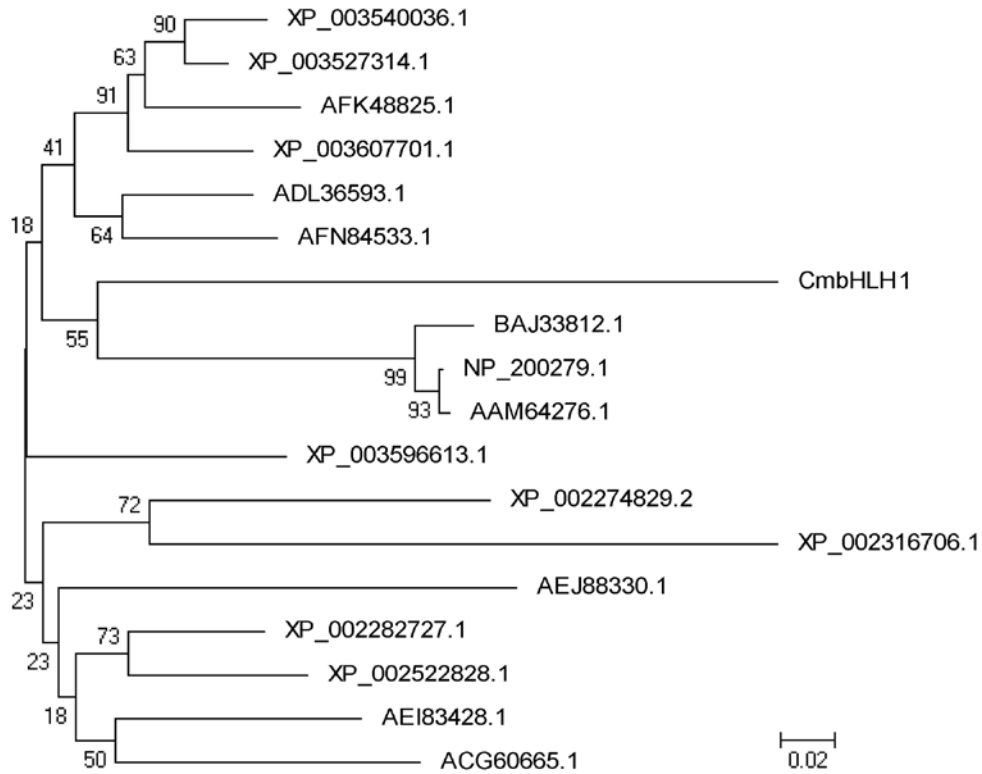

Supplementary Fig. S1 A phylogenetic analysis shows that CmbHLH1 is closely related to the *A. thaliana* protein ILR3 (NP\_200279.1). *A. thaliana* ILR3 (NP\_200279.1) and bHLH (AAM64276.1), *Camellia sinensis* bHLH1 (AEI83428.1), *Fragaria x ananassa* bHLH (AFN84533.1), *Glycine max* ILR3-like (XP\_003540036.1) and ILR3-like isoform 1 (XP\_003527314.1), *Lotus japonicas* bHLH (AFK48825.1), *Malus domestica* bHLH (ADL36593.1), *Medicago truncatula* ILR3 (XP\_003596613.1), *Nicotiana tabacum* bHLH (ACG60665.1), *Populus trichocarpa* bHLH (XP\_002316706.1), *Ricinus communis* bHLH (XP\_002522828.1), *Tamarix hispida* MYC (AEJ88330.1), *Thellungiella halophila* bHLH (BAJ33812.1), *Vitis vinifera* ILR3 (XP\_002282727.1) and ILR3-like (XP\_002274829.2).

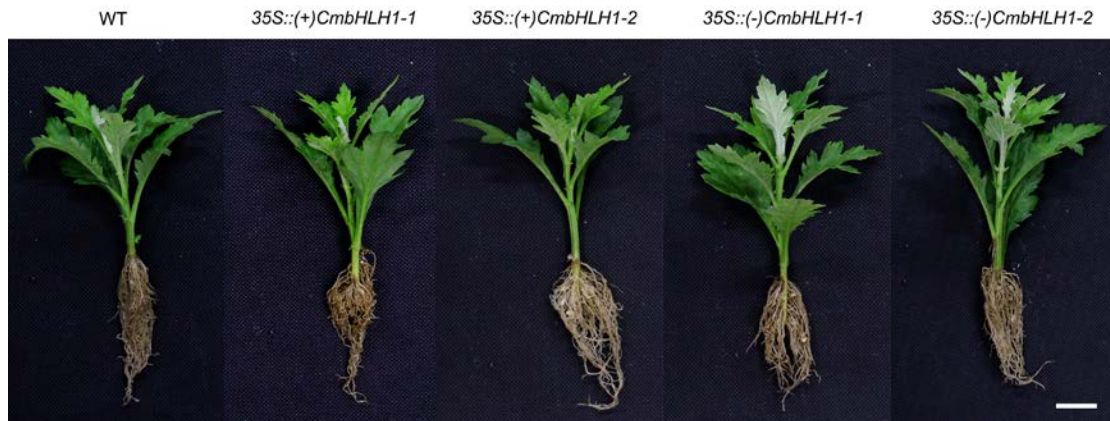

Supplementary Fig. S2 The morphology of sense, antisense transgenic and wild type plants at seedling stage.

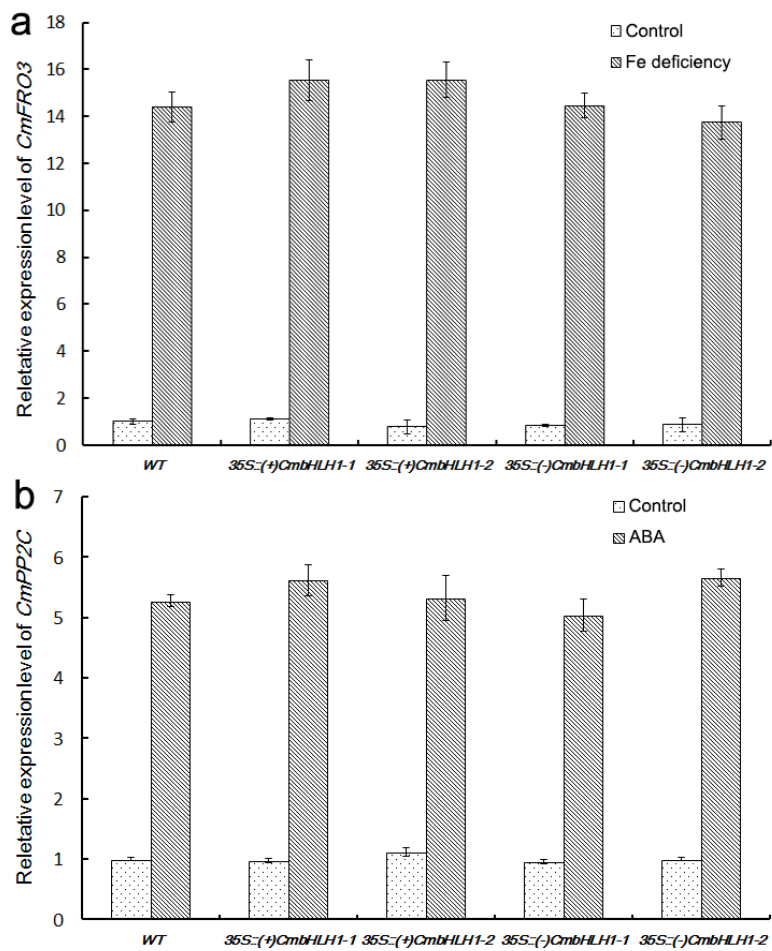

Supplementary Fig. S3 The transcription of *CmFRO3* and *CmPP2C* in *CmbHLH1* transgenic plants. (a) *CmFRO3* in plants subjected to Fe deficiency, (b) *CmPP2C* in plants treated with ABA.

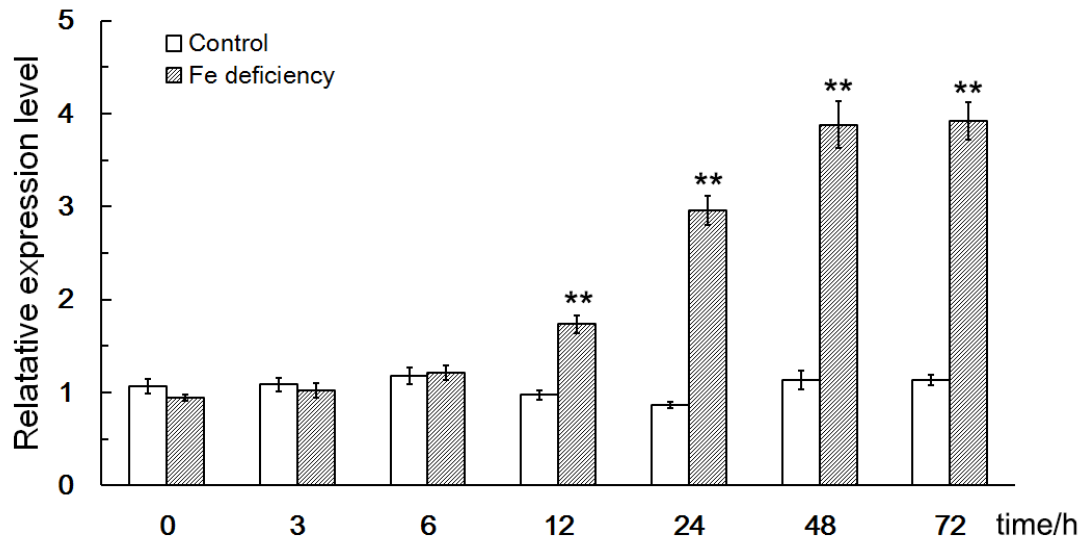

Supplementary Fig. S4 *CmPP2C* transcription in response to Fe deficiency. \*\*, difference significant at  $P < 0.01$ .
